# Supplementary material for: Computationally validated magnesium and graphene oxide anchored SnO2 quantum dots for RhB reduction and antibacterial activity
Source: Royal Society of Chemistry journal article supplement (doi:10.1039/d5na00915d), 2026-04-02
Supplement: d5na00915d1.pdf [file d5na00915d1.pdf]

## Computationally validated magnesium and graphene oxide anchored SnO<sub>2</sub> quantum dots for RhB reduction and antibacterial activity

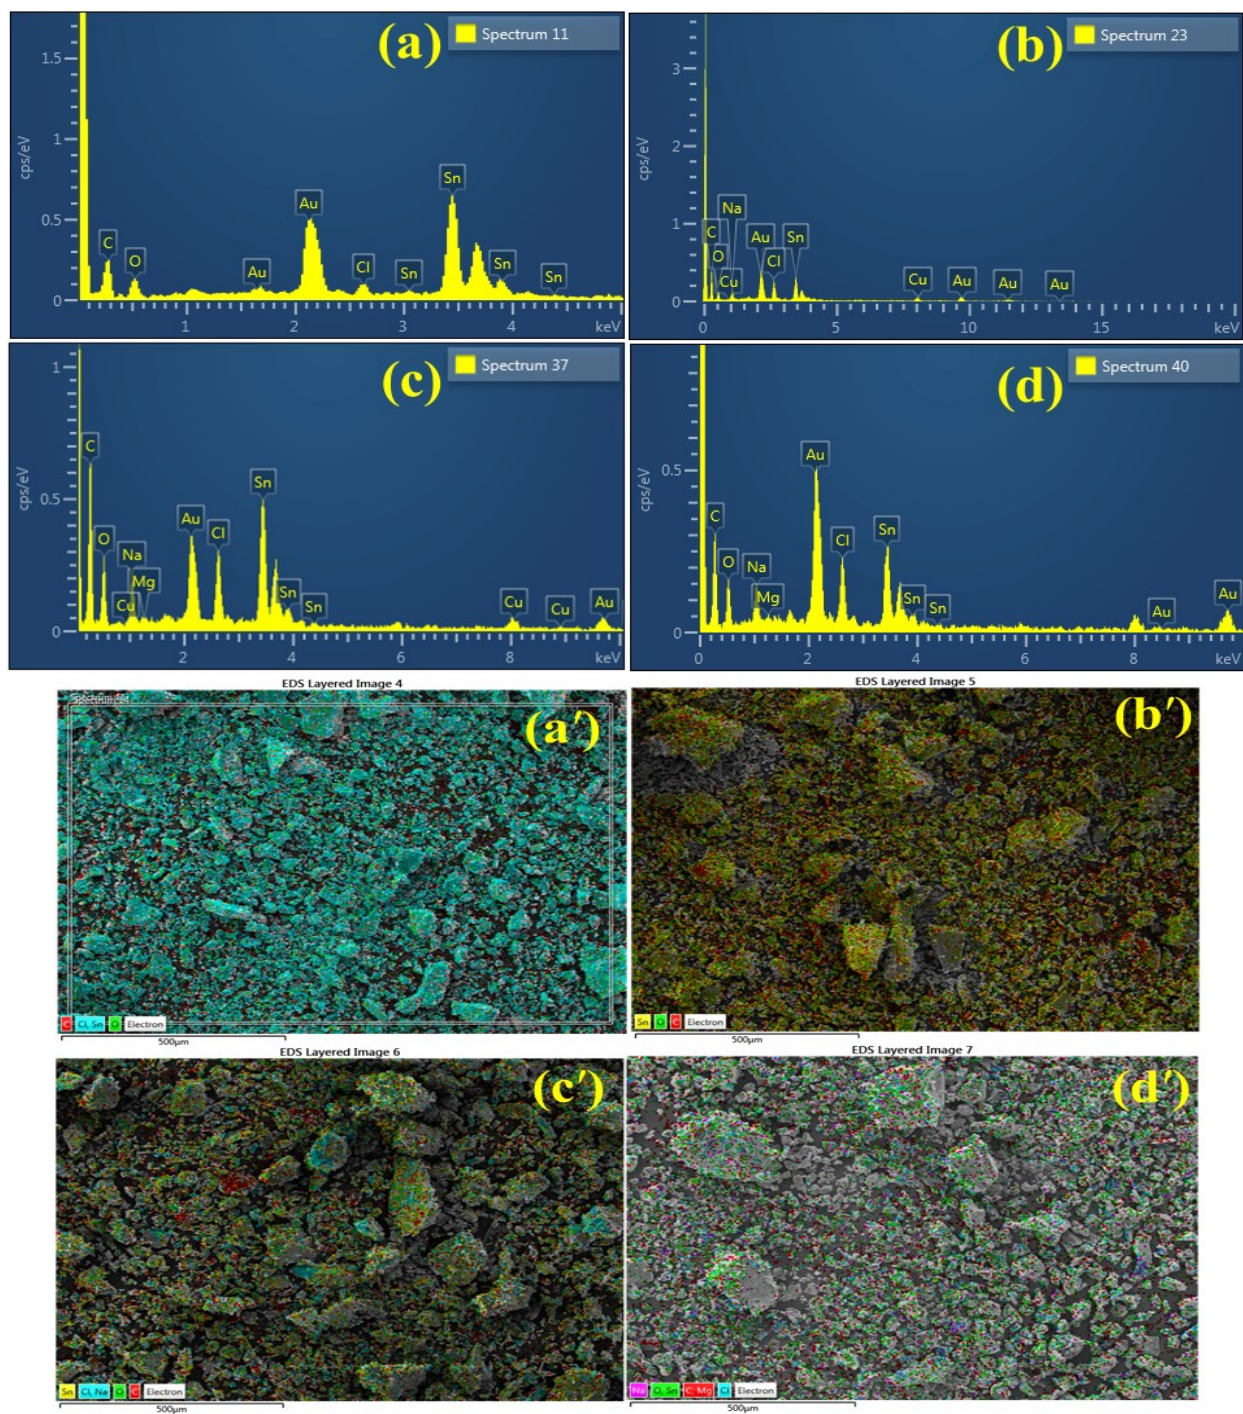

Fig. S1 (a-d) EDS and (a'-d') mapping of SnO<sub>2</sub>, GO-SnO<sub>2</sub>, 2% Mg/GO-SnO<sub>2</sub> and 4% Mg/GO-SnO<sub>2</sub>

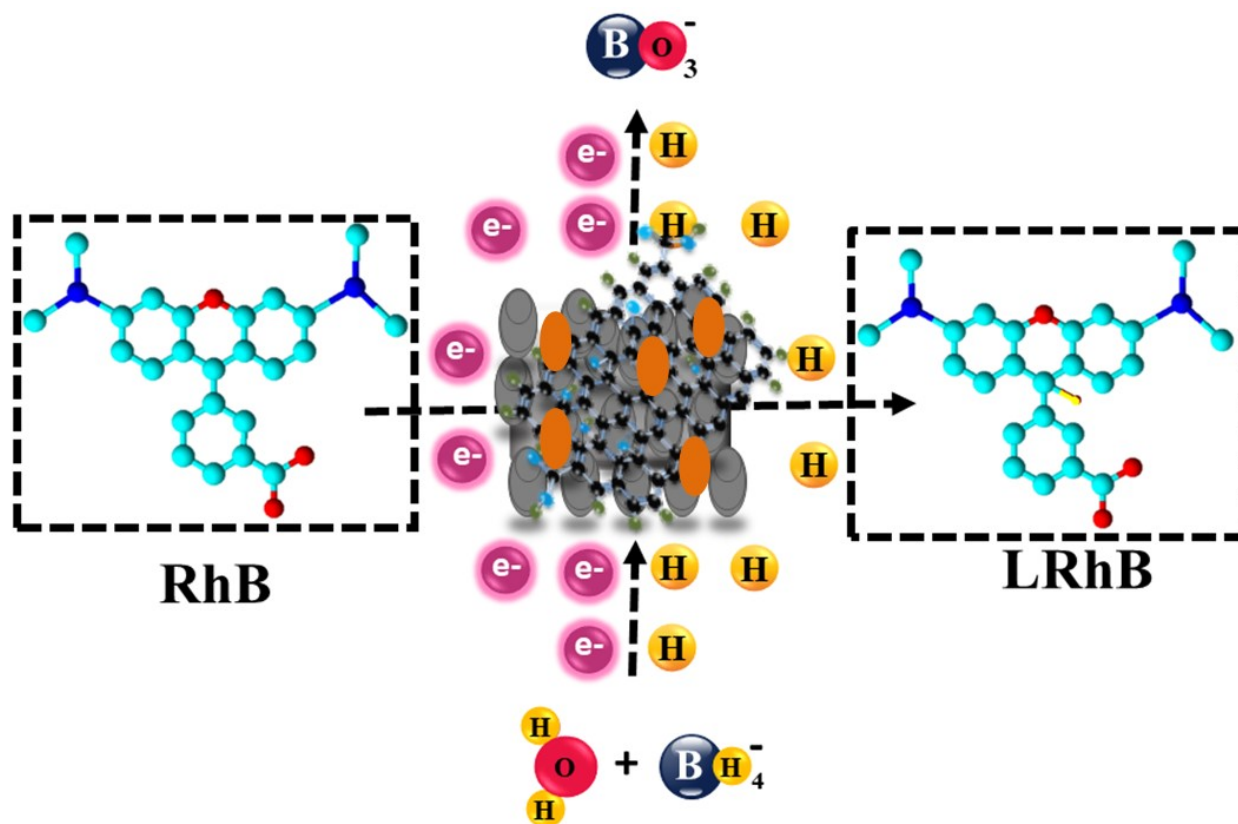

Fig. S2 Catalysis mechanism of doped SnO<sub>2</sub>

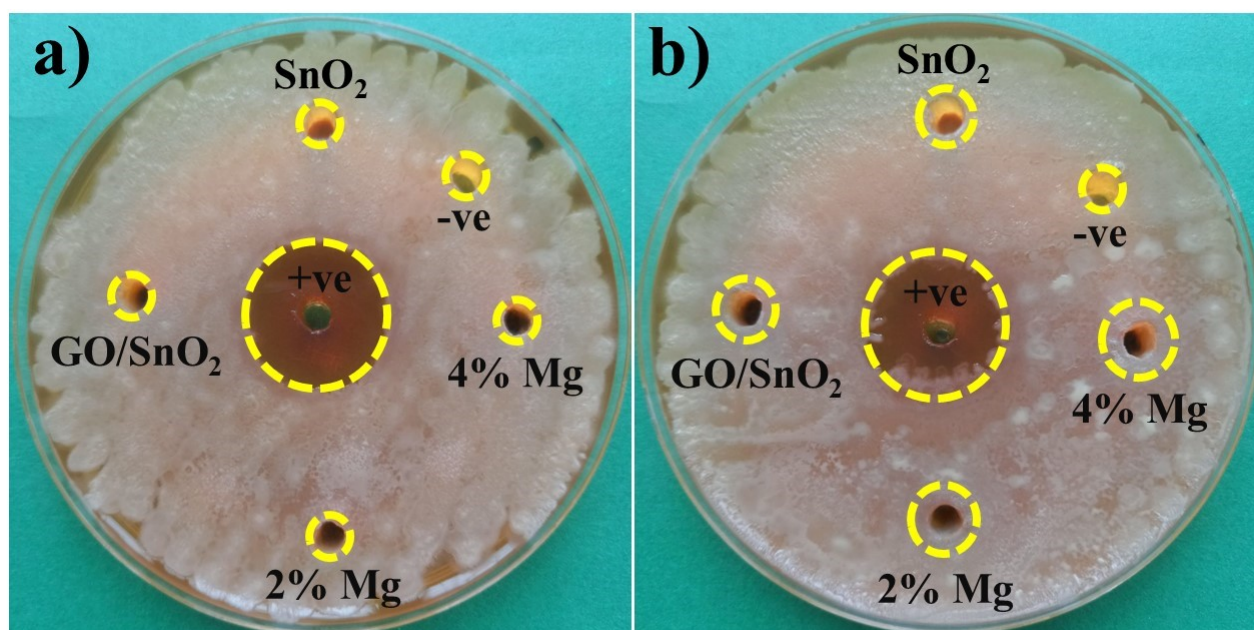

Fig. S3 In-vitro antibacterial activity of as synthesized SnO<sub>2</sub> quantum dots

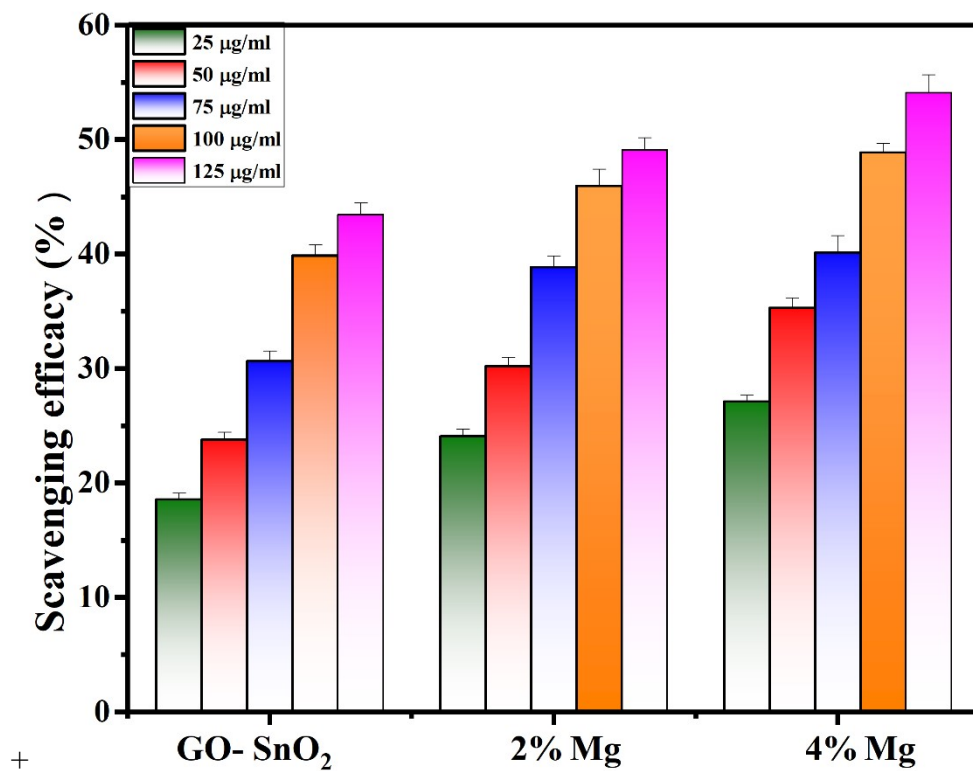

Fig. S4 Scavenging Potential of Mg/GO-SnO<sub>2</sub>
